# Supplementary material for: Mitigative Effects of PFF-A Isolated from Ecklonia cava on Pigmentation in a Zebrafish Model and Melanogenesis in B16F10 Cells
Source: MDPI journal article supplement (doi:10.3390/md20020123), 2022-02-04
Supplement: s1 [file s1]

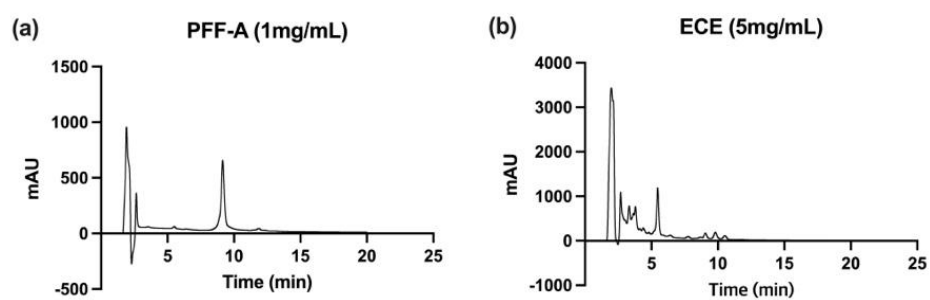

**Supplementary Figure S1.** HPLC chromatogram. (a) Phlorofucofuroeckol-A (PFF-A, 1mg/mL) (b) *Ecklonia cava* 50% ethanol extract (ECE, 5mg/mL)
